# Supplementary material for: Identifying Key Biomarkers and Immune Infiltration in Female Patients with Ischemic Stroke Based on Weighted Gene Co-Expression Network Analysis
Source: Neural Plast. 2022 Apr 8;2022:5379876. doi: 10.1155/2022/5379876 (PMC9012649; doi:10.1155/2022/5379876)
Supplement: Supplementary Materials — The detailed R code is summarized in the supplementary materials. [file 5379876.f1.zip]

Archive with 3 entries (3 files):
- WGCNA13.GEOwgcna R code .txt
- WGCNA16.GO.txt
- WGCNA17.KEGG R code .txt
