# Supplementary material for: Identifying Key Biomarkers and Immune Infiltration in Female Patients with Ischemic Stroke Based on Weighted Gene Co-Expression Network Analysis
Source: Neural Plast. 2022 Apr 8;2022:5379876. doi: 10.1155/2022/5379876 (PMC9012649; doi:10.1155/2022/5379876)
Supplement: Supplementary Materials — The detailed R code is summarized in the supplementary materials. [file 5379876.f1.zip › WGCNA16.GO.txt]

#install.packages("colorspace")
#install.packages("stringi")
#install.packages("ggplot2")

#if (!requireNamespace("BiocManager", quietly = TRUE))
#    install.packages("BiocManager")
#BiocManager::install("DOSE")
#BiocManager::install("clusterProfiler")
#BiocManager::install("enrichplot")


#ÒýÓÃ°ü
library("clusterProfiler")
library("org.Hs.eg.db")
library("enrichplot")
library("ggplot2")

pvalueFilter=0.05         #pÖµ¹ýÂËÌõ¼þ
qvalueFilter=1            #½ÃÕýºóµÄpÖµ¹ýÂËÌõ¼þ

setwd("C:\\Users\\lexb4\\Desktop\\WGCNA\\16.GO")             #ÉèÖÃ¹¤×÷Ä¿Â¼
rt=read.table("id.txt",sep="\t",header=T,check.names=F)      #¶ÁÈ¡id.txtÎÄ¼þ
rt=rt[is.na(rt[,"entrezID"])==F,]                            #È¥³ý»ùÒòidÎªNAµÄ»ùÒò
gene=rt$entrezID

#¶¨ÒåÑÕÉ«ÀàÐÍ
colorSel="qvalue"
if(qvalueFilter>0.05){
	colorSel="pvalue"
}

#GO¸»¼¯·ÖÎö
kk=enrichGO(gene = gene,OrgDb = org.Hs.eg.db, pvalueCutoff =1, qvalueCutoff = 1, ont="all", readable =T)
GO=as.data.frame(kk)
GO=GO[(GO$pvalue<pvalueFilter & GO$qvalue<qvalueFilter),]
#±£´æ¸»¼¯½á¹û
write.table(GO,file="GO.txt",sep="\t",quote=F,row.names = F)

#¶¨ÒåÏÔÊ¾TermÊýÄ¿
showNum=10
if(nrow(GO)<30){
	showNum=nrow(GO)
}

#Öù×´Í¼
pdf(file="barplot.pdf",width = 9,height =7)
bar=barplot(kk, drop = TRUE, showCategory =showNum,split="ONTOLOGY",color = colorSel) + facet_grid(ONTOLOGY~., scale='free')
print(bar)
dev.off()
		
#ÆøÅÝÍ¼
pdf(file="bubble.pdf",width = 9,height =7)
bub=dotplot(kk,showCategory = showNum, orderBy = "GeneRatio",split="ONTOLOGY", color = colorSel) + facet_grid(ONTOLOGY~., scale='free')
print(bub)
dev.off()
		

######ÉúÐÅ×ÔÑ§Íø: https://www.biowolf.cn/
######¿Î³ÌÁ´½Ó1: https://shop119322454.taobao.com
######¿Î³ÌÁ´½Ó2: https://ke.biowolf.cn
######¿Î³ÌÁ´½Ó3: https://ke.biowolf.cn/mobile
######¹â¿¡ÀÏÊ¦ÓÊÏä£ºseqbio@foxmail.com
######¹â¿¡ÀÏÊ¦Î¢ÐÅ: seqBio
